# Supplementary material
Source: ML conference proceedings conference paper supplement (https://proceedings.mlr.press/v164/garg22a.html)
Supplement: Supplementary file 1 [file garg22a-supp.zip]

Archive with 1 entries (1 files):
- 2021_Garg_SeqMatchNet_Supp_CoRL.pdf
